# Supplementary material for: Lack of Type VIII Collagen in Mice Ameliorates Diabetic Nephropathy
Source: Oxford University Press journal article supplement (doi:10.2337/db08-0183), 2009-04-28
Supplement: db080183-sup-online_appendix.doc [file db080183-sup-online_appendix.doc]

**ONLINE APPENDIX**

*Cell culture and transfection.* Murine corneal endothelial cells (mCEC), murine tubular epithelial (MCT) and rat glomerular endothelial cells (GER) (15; 34; 35) were grown in DMEM with 100 mg/dl glucose, 10% FBS, 100 units/ml penicillin and 100 g/ml streptomycin.

To clone full-length *Col8a1* cDNA RNA was extracted from mCEC using a RNA extraction Kit. First strand cDNA synthesis was catalyzed by SuperScript II RT (Invitrogen) using DNase I treated total RNA. *Col8a1* cDNA was synthesized by PCR using the primers NheI/cosaq/5' end sense: 5'-GGCTAGCGCCACCATGGCTGTGCCACCAGGCCCT-3' and XhoI/stop/flag antisense: 5'-ACTCGAGTTACTTGTCATCGTCGTCCTTGTAGTCCATGGGATACAATAAATATC -3' and the Long template PCR system (Roche). Amplicons were subjected to automatic DNA sequencing to demonstrate the specificity of the PCR product and cloned into pCEP-PU (36). Full-length *Col8a1* cDNA or pCEP-Pu control vector were transfected into MMC using Lipofectamin (Invitrogen) according to the manufactures protocol. Selection of transfected cells was accomplished in the presence of 1.5 g/ml puromycin.

*Western blot analysis.* 106 MMCs were seeded in DMEM supplemented with 100 mg/dl glucose, 10% FCS for 24 hours to allow cell attachment and matrix synthesis. Serum free medium was than added for 24 hours to synchronize the cells in G0 phase. Quiescent cells were either incubated with 0, 10, 25, 50 ng/ml PDGF-BB (R&D Systems, Wiesbaden, Germany), 10% FCS for 10 minutes (ERK 1,2 blots) or with 50 ng/ml PDGF-BB for 6 and 12 hours (p27Kip1 blots). Cells were lysed in ice-cold 150 mM Tris-HCl, pH 6.8, 6.6% SDS with proteinase inhibitor and denatured in loading buffer (5% glycerol/0.03% bromophenol blue/10 mmol/l dithiothreitol) at 100°C for 5 minutes. Cell lysates were separated by 12% SDS-PAGE, electroblotted onto PVDF filters with a semi-dry blotting apparatus. Filters were blocked with 5% (w/v) BSA in TBS-0.1% Tween20 and incubated in polyclonal rabbit anti- ERK 1,2, -pERK 1,2 (Cell Signaling Technology, Karlsruhe, Germany, dilution 1:1000) or monoclonal mouse p27Kip1 (Cell Signaling, dilution 1:1000, 1 hour, room temperature). An anti-mouse or rabbit-IgG conjugated to alkaline phosphatase was added at a concentration of 1:2500 for 1 h at room temperature. Detection of the alkaline phosphatase activity was performed with CDP-Star (Tropix, Bedford, USA) in an assay buffer (10 mM Tris HCl, pH 9.6, 150 mM NaCl, 50 mM MgCl2) according to the manufacturer’s recommendations. Signal detection was performed by chemiluminescence (Amersham). Re-incubations of blots against b-actin (anti mouse b-actin 1:3000; Sigma) were performed to account for small protein loading and transfer variabilities.

*Isolation of RNA and Northern blots.* 107 MMC, MCT or GER were made quiescent in serum-free medium containing 100 mg/dl glucose. After 24 hours the D-glucose concentration was raised to 450mg/dl for 24 hours. Cells were washed in ice cold PBS, lysed in acid guanidinium thiocyanate, and total RNA was isolated as described (36). 25 g of total RNA was denatured in formamide-formaldehyde at 65°C and separated on a 1.2% agarose gel containing 2.2 mol/L formaldehyde. RNA was blotted by downward vacuum transfer onto a nylon filter. Hybridization was performed at 42°C using a DNA probe containing a 1.2 kb BamHI / EcoRV fragment of 3'UTR of the *Col8a1* gene and a 0.5 kb EcoRV / SpeI fragment of 3'UTR of the *Col8a2* gene. A 2.0-kb cDNA fragment encoding the murine ribosomal 18S was used as control. In a second experiment, rested MMC were cultured for 6, 12, 24, 48 and 96 hours in serum-free DMEM containing either 100 mg/dl or 450 mg/dl D-glucose. In some control MMC the osmolarity was increased by D-mannitol as described (37). mCEC RNA was used as a control. All Northern blots were repeated at least twice with qualitatively similar results.
